# Supplementary material for: Estimating Transmission Potential of H5N1 Viruses Among Humans in Egypt Using Phylogeny, Genetic Distance and Sampling Time Interval
Source: Front Microbiol. 2019 Dec 3;10:2765. doi: 10.3389/fmicb.2019.02765 (PMC6901801; doi:10.3389/fmicb.2019.02765)
Supplement: TABLE S1 — The GenBank accession numbers, strain names, sampling dates, and sampling locations of nucleotide sequences used in this study. [file Table_1.XLSX]

## Sheet: Sheet1
Accession number	Host	Strain name	Sampling date	Sampling location
EF535822	Human	A/Egypt/2321-NAMRU3/2007(H5N1)	2007-03-13	Aswan
CY062439	Human	A/Egypt/7021-NAMRU3/2006(H5N1)	2006-05-16	Menia
KP702165	Human	A/Egypt/MOH-NRC-7271/2014(H5N1)	2014-11-26	Menia
KP702173	Human	A/Egypt/MOH-NRC-7305/2014(H5N1)	2014-11-28	Menia
KR063683	Human	A/Egypt/MOH-NRC-8434/2014(H5N1)	2014-12-27	Menoufiya
CY041908	Human	A/Egypt/N00001/2009(H5N1)	2009-01-11	Giza
KP864432	Human	A/Egypt/N0001/2015(H5N1)	2015-01-01	Menoufiya
KP864433	Human	A/Egypt/N0002/2015(H5N1)	2015-01-01	Menia
KP864434	Human	A/Egypt/N0004/2015(H5N1)	2015-01-05	Aswan
KP864435	Human	A/Egypt/N0005/2015(H5N1)	2015-01-07	Cairo
CY062464	Human	A/Egypt/N00269/2010(H5N1)	2010-01-11	Beni Suef
CY062466	Human	A/Egypt/N00270/2010(H5N1)	2010-01-12	Daqahlia
CY041910	Human	A/Egypt/N00585/2009(H5N1)	2009-01-23	Menoufiya
CY041912	Human	A/Egypt/N00605/2009(H5N1)	2009-02-03	Suez
CY041914	Human	A/Egypt/N00606/2009(H5N1)	2009-02-07	Menia
JX456101	Human	A/Egypt/N00951/2012(H5N1)	2012-02-21	Behaira
CY041916	Human	A/Egypt/N01310/2009(H5N1)	2009-02-28	Fayoum
CY062468	Human	A/Egypt/N01360/2010(H5N1)	2010-02-02	Qalubiya
CY062470	Human	A/Egypt/N01644/2010(H5N1)	2010-02-07	Helwan
KM392416	Human	A/Egypt/N01753/2014(H5N1)	2014-03-06	Behaira
KM392417	Human	A/Egypt/N01754/2014(H5N1)	2014-03-07	Demiatta
CY062474	Human	A/Egypt/N02038/2010(H5N1)	2010-02-15	Daqahlia
CY041918	Human	A/Egypt/N02039/2009(H5N1)	2009-03-03	Alexandria
CY062476	Human	A/Egypt/N02127/2010(H5N1)	2010-02-13	Kafr el sheikh
JX456104	Human	A/Egypt/N02137/2012(H5N1)	2012-03-29	Giza
CY041920	Human	A/Egypt/N02407/2009(H5N1)	2009-03-09	Menoufiya
CY062478	Human	A/Egypt/N02554/2010(H5N1)	2010-02-23	Qalubiya
CY041922	Human	A/Egypt/N02563/2009(H5N1)	2009-03-14	Assuit
CY041924	Human	A/Egypt/N02752/2009(H5N1)	2009-03-24	Qena
CY062480	Human	A/Egypt/N02770/2010(H5N1)	2010-02-27	Qalubiya
CY062482	Human	A/Egypt/N03071/2010(H5N1)	2010-03-03	Kafr el sheikh
CY062484	Human	A/Egypt/N03072/2010(H5N1)	2010-03-07	Cairo
CY041926	Human	A/Egypt/N03228/2009(H5N1)	2009-03-30	Menoufiya
CY041928	Human	A/Egypt/N03272/2009(H5N1)	2009-04-01	Behaira
CY041930	Human	A/Egypt/N03434/2009(H5N1)	2009-04-15	Kafr el sheikh
CY041932	Human	A/Egypt/N03438/2009(H5N1)	2009-04-16	Cairo
CY041934	Human	A/Egypt/N03439/2009(H5N1)	2009-04-18	Kafr el sheikh
CY041936	Human	A/Egypt/N03450/2009(H5N1)	2009-04-19	Sohag
CY041938	Human	A/Egypt/N04316/2009(H5N1)	2009-05-09	Sohag
CY041940	Human	A/Egypt/N04394/2009(H5N1)	2009-05-11	Sharqiya
CY041943	Human	A/Egypt/N04396/2009(H5N1)	2009-05-17	Daqahlia
CY062486	Human	A/Egypt/N04434/2010(H5N1)	2010-03-31	Fayoum
CY041945	Human	A/Egypt/N04526/2009(H5N1)	2009-05-18	Daqahlia
CY041947	Human	A/Egypt/N04527/2009(H5N1)	2009-05-18	Sohag
CY041949	Human	A/Egypt/N04822/2009(H5N1)	2009-05-25	Sharqiya
CY041951	Human	A/Egypt/N04823/2009(H5N1)	2009-05-25	Sharqiya
CY041953	Human	A/Egypt/N04979/2009(H5N1)	2009-05-31	Kafr el sheikh
CY041955	Human	A/Egypt/N05056/2009(H5N1)	2009-06-06	Daqahlia
CY062447	Human	A/Egypt/N05912/2009(H5N1)	2009-06-16	Kafr el sheikh
CY062453	Human	A/Egypt/N08835/2009(H5N1)	2009-08-01	Menoufiya
CY062455	Human	A/Egypt/N09174/2009(H5N1)	2009-08-26	Menoufiya
CY062457	Human	A/Egypt/N09539/2009(H5N1)	2009-09-16	Alexandria
CY062459	Human	A/Egypt/N11981/2009(H5N1)	2009-11-22	Menia
KP864426	Human	A/Egypt/N5560/2014(H5N1)	2014-12-15	Assuit
KP864427	Human	A/Egypt/N5561/2014(H5N1)	2014-12-14	Menia
KP864428	Human	A/Egypt/N5563/2014(H5N1)	2014-12-23	Menia
KP864429	Human	A/Egypt/N5564/2014(H5N1)	2014-12-26	Helwan
KP864430	Human	A/Egypt/N5565/2014(H5N1)	2014-12-24	Assuit
KP864431	Human	A/Egypt/N5566/2014(H5N1)	2014-12-26	Giza
CY062472	Human	A/Egypt/N01982/2010(H5N1)	2010-02-12	Menoufiya
LC106066	Avian	A/chicken/Ismailia/144CA/2014	2014-11-01	Ismailia
LC106067	Avian	A/chicken/Sharkeya/14209SS/2014	2014-12-23	Sharkeya
LC106068	Avian	A/chicken/Kafr_Elsheikh/UT-151CAD/2015	2015-01-01	Kafr_Elsheikh
LC106069	Avian	A/duck/Cairo/157CA/2015	2015-01-11	Cairo
LC106070	Avian	A/duck/Menia/1543S/2015	2015-01-12	Menia
LC106071	Avian	A/turkey/Menia/15248S/2015	2015-02-26	Menia
LC106072	Avian	A/duck/Cairo/1578CA/2015	2015-03-02	Cairo
LC106073	Avian	A/duck/Dakahlia/1536CAG/2015	2015-02-10	Dakahlia
LC106074	Avian	A/duck/Giza/15292S/2015	2015-03-09	Giza
LC093071	Avian	A/Pigeon/Egypt/RIMD18/2009	2009-01-01	Egypt
LC093079	Avian	A/Pigeon/Egypt/RIMD20/2009	2009-01-01	Alexandria
KY951986	Avian	A/chicken/Behera/1/2015	2015-03-11	Behaira
KY951987	Avian	A/chicken/Dakahlia/2/2015	2015-08-20	Dakahlia
KF178948	Avian	A/chicken/Egypt/0626/2006	2006-02-28	Alexandria
EU372944	Avian	A/chicken/Egypt/06459-3-NLQP/2006	2006-03-13	Menoufiya
EU372945	Avian	A/chicken/Egypt/06495-NLQP/2006	2006-03-17	Sharkia
EU372946	Avian	A/chicken/Egypt/06541-NLQP/2006	2006-03-20	Cairo
EU496383	Avian	A/chicken/Egypt/06553-NLQP/2006	2006-03-21	Damitta
KR732525	Avian	A/chicken/Egypt/06553-NLQP/2006	2006-01-01	Egypt
EU496384	Avian	A/chicken/Egypt/06612-NLQP/2006	2006-03-24	Sohag
EU372947	Avian	A/chicken/Egypt/06959-NLQP/2006	2006-11-27	Gharbia
GQ184214	Avian	A/chicken/Egypt/07118-NLQP/2007	2007-03-01	Qalyobia
KR732539	Avian	A/chicken/Egypt/07118-NLQP/2007	2007-01-01	Egypt
EU496386	Avian	A/chicken/Egypt/07125-NLQP/2007	2007-04-03	Behaira
EU496389	Avian	A/chicken/Egypt/07202-NLQP/2007	2007-12-19	Quena
GQ184216	Avian	A/chicken/Egypt/07480S-NLQP/2007	2007-06-25	Luxor
EU496396	Avian	A/chicken/Egypt/07665S-NLQP/2007	2007-12-24	Sharkia
GQ184219	Avian	A/chicken/Egypt/0811-NLQP/2008	2008-01-04	Luxor
GQ184246	Avian	A/chicken/Egypt/08124S-NLQP/2008	2008-01-10	Behaira
KR732574	Avian	A/chicken/Egypt/0813-NLQP/2008	2008-01-01	Egypt
GQ184247	Avian	A/chicken/Egypt/08139S-NLQP/2008	2008-01-11	Qalyobia
GQ184221	Avian	A/chicken/Egypt/0815-NLQP/2008	2008-01-05	Qalyobia
GQ184222	Avian	A/chicken/Egypt/0823-NLQP/2008	2008-01-07	Gharbia
JF746739	Avian	A/chicken/Egypt/0827-NLQP/2008	2008-01-01	Egypt
JF746737	Avian	A/chicken/Egypt/083-NLQP/2008	2008-01-01	Egypt
CY044032	Avian	A/chicken/Egypt/083/2008	2008-01-02	Gharbia
GQ184223	Avian	A/chicken/Egypt/0831-NLQP/2008	2008-01-10	Qalyobia
CY041290	Avian	A/chicken/Egypt/0836/2008	2008-01-15	Luxor
GQ184224	Avian	A/chicken/Egypt/0837-NLQP/2008	2008-01-17	Qalyobia
GQ184249	Avian	A/chicken/Egypt/08371S-NLQP/2008	2008-02-09	Menoufiya
GQ184225	Avian	A/chicken/Egypt/0838-NLQP/2008	2008-01-16	Menia
GQ184226	Avian	A/chicken/Egypt/0841-NLQP/2008	2008-01-17	Suez
GQ184228	Avian	A/chicken/Egypt/0847-NLQP/2008	2008-01-18	Fayoum
GQ184218	Avian	A/chicken/Egypt/085-NLQP/2008	2008-01-03	Alexandria
GQ184229	Avian	A/chicken/Egypt/0850-NLQP/2008	2008-01-22	Luxor
GQ184230	Avian	A/chicken/Egypt/0855-NLQP/2008	2008-01-26	Qalyobia
GQ184231	Avian	A/chicken/Egypt/0859-NLQP/2008	2008-01-31	Qalyobia
GQ184232	Avian	A/chicken/Egypt/0865-NLQP/2008	2008-02-06	Giza
GQ184233	Avian	A/chicken/Egypt/0869h3-NLQP/2008	2008-02-19	Sharkia
GQ184234	Avian	A/chicken/Egypt/0870-NLQP/2008	2008-02-17	Cairo
GQ184236	Avian	A/chicken/Egypt/0876-NLQP/2008	2008-04-06	Qalyobia
GQ184238	Avian	A/chicken/Egypt/0879-NLQP/2008	2008-05-14	6th of October
GQ184239	Avian	A/chicken/Egypt/0880-NLQP/2008	2008-05-18	Giza
EU496399	Avian	A/chicken/Egypt/088S-NLQP/2008	2008-01-01	Dakahlia
CY041298	Avian	A/chicken/Egypt/0891/2008	2008-09-26	Fayoum
GQ184241	Avian	A/chicken/Egypt/0894-NLQP/2008	2008-11-27	Menia
GQ184242	Avian	A/chicken/Egypt/0896-NLQP/2008	2008-12-24	Menia
GU002703	Avian	A/chicken/Egypt/0910QL-NLQP/2009	2009-04-01	Luxor
HQ198254	Avian	A/chicken/Egypt/091317s/2009	2009-12-01	Menoufiya
JF746741	Avian	A/chicken/Egypt/0918-NLQP/2009	2009-02-01	Egypt
GU002687	Avian	A/chicken/Egypt/0918Q-NLQP/2009	2009-03-01	Qalyobia
GU002672	Avian	A/chicken/Egypt/092-NLQP/2009	2009-01-01	Menoufiya
GU002700	Avian	A/chicken/Egypt/0920-NLQP/2009	2009-02-01	Menoufiya
GU002690	Avian	A/chicken/Egypt/09279S-NLQP/2009	2009-04-01	Egypt
GU002692	Avian	A/chicken/Egypt/09359S-NLQP/2009	2009-04-01	Sharkia
GU002693	Avian	A/chicken/Egypt/09519S-NLQP/2009	2009-05-01	Qalyobia
GU002695	Avian	A/chicken/Egypt/09568S-NLQP/2009	2009-05-01	Egypt
HQ198252	Avian	A/chicken/Egypt/095941v/2009	2009-05-01	Qalyobia
GU002680	Avian	A/chicken/Egypt/0960-NLQP/2009	2009-03-01	Behaira
GU002698	Avian	A/chicken/Egypt/096293V-NLQP/2009	2009-05-01	Qalyobia
GU002688	Avian	A/chicken/Egypt/0962S-NLQP/2009	2009-02-01	Behaira
GU002689	Avian	A/chicken/Egypt/0963S-NLQP/2009	2009-02-01	Sharkia
GU002705	Avian	A/chicken/Egypt/096767V-NLQP/2009	2009-05-01	Qalyobia
KR732527	Avian	A/chicken/Egypt/096L-NLQP/2009	2009-01-01	Egypt
GU002683	Avian	A/chicken/Egypt/0975-NLQP/2009	2009-04-01	Kafr-Elshikh
GU366078	Avian	A/chicken/Egypt/0987-NLQP/2009	2009-05-12	Egpt
CY061552	Avian	A/chicken/Egypt/1/2008	2008-01-01	Qalubiya
FR687255	Avian	A/chicken/Egypt/1/2009	2009-01-01	Qalubiya
JN807782	Avian	A/chicken/Egypt/10112SG/2010	2010-06-26	Dakahlia
HQ198281	Avian	A/chicken/Egypt/10116s/2010	2010-02-01	Qalyobia
HQ198274	Avian	A/chicken/Egypt/10127s/2010	2010-02-01	Helwan
HQ198275	Avian	A/chicken/Egypt/1012sf/2010	2010-02-01	Fayoum
JN807801	Avian	A/chicken/Egypt/10132/2010	2010-10-21	6th of October
JN807777	Avian	A/chicken/Egypt/10158SF/2010	2010-04-29	Beni Suif
HQ198295	Avian	A/chicken/Egypt/10159s/2010	2010-03-01	Qalyobia
HQ198277	Avian	A/chicken/Egypt/101604v/2010	2010-02-01	New valley
HQ198290	Avian	A/chicken/Egypt/1020d/2010	2010-03-01	Alexandria
JN807775	Avian	A/chicken/Egypt/1021AD/2010	2010-04-13	Alexandria
HQ198292	Avian	A/chicken/Egypt/1021L/2010	2010/03/	Luxor
JN807788	Avian	A/chicken/Egypt/10250SF/2010	2010-08-02	Beni Suif
JN807792	Avian	A/chicken/Egypt/10259SF/2010	2010-08-08	Beni Suif
HQ198296	Avian	A/chicken/Egypt/10265s/2010	2010-04-01	Menia
HQ198261	Avian	A/chicken/Egypt/1029/2010	2010-01-01	Menoufiya
HQ198270	Avian	A/chicken/Egypt/102d/2010	2010-02-01	Behaira
KR732445	Avian	A/chicken/Egypt/102d/2010	2010-01-01	Egypt
HQ198263	Avian	A/chicken/Egypt/1034/2010	2010-02-01	Menoufiya
JN807802	Avian	A/chicken/Egypt/10347SF/2010	2010-10-23	Fayoum
HQ198280	Avian	A/chicken/Egypt/1034qd/2010	2010-02-01	Alexandria
HQ198264	Avian	A/chicken/Egypt/1035/2010	2010-02-01	Egypt
JN807790	Avian	A/chicken/Egypt/1038AL/2010	2010-08-05	Luxor
JN807804	Avian	A/chicken/Egypt/10413SF/2010	2010-12-10	Egypt
JN807772	Avian	A/chicken/Egypt/1041AG/2010	2010-01-27	Dakahlia
HQ198266	Avian	A/chicken/Egypt/1042/2010	2010-02-01	Helwan
JN807784	Avian	A/chicken/Egypt/10432S/2010	2010-07-13	Qalyobia
HQ198255	Avian	A/chicken/Egypt/1050ss/2010	2010-01-01	Sharkia
JN807803	Avian	A/chicken/Egypt/10512AG/2010	2010-11-22	Dakahlia
JN807797	Avian	A/chicken/Egypt/10513S/2010	2010-09-29	Menoufiya
HQ198284	Avian	A/chicken/Egypt/1052g/2010	2010-02-01	Qalyobia
HQ198269	Avian	A/chicken/Egypt/1063/2010	2010-02-01	Qalyobia
KR732550	Avian	A/chicken/Egypt/1063/2010	2010-01-01	Egypt
HQ198278	Avian	A/chicken/Egypt/1071g/2010	2010-02-01	Dakahlia
EF441276	Avian	A/chicken/Egypt/1078-NAMRU3/2006	2005-06-28	Menoufiya
EF441277	Avian	A/chicken/Egypt/1079-NAMRU3/2007	2006-01-01	Beni suif
EF441278	Avian	A/chicken/Egypt/1080-NAMRU3/2006	2006-01-01	Damietta
EF441279	Avian	A/chicken/Egypt/1081-NAMRU3/2006	2006-01-01	Gharbiya
JN807778	Avian	A/chicken/Egypt/1090/2010	2010-06-08	6th of October
JN807785	Avian	A/chicken/Egypt/1098/2010	2010-07-19	Qalyobia
FJ686839	Avian	A/chicken/Egypt/10NLQP-CLEVB299/2008	2008-04-19	Dakahlya
JN807812	Avian	A/chicken/Egypt/1112/2011	2011-01-10	Menoufiya
JN807855	Avian	A/chicken/Egypt/11124SF/2011	2011-03-16	Beni Sueif
JN807847	Avian	A/chicken/Egypt/1112AF/2011	2011-03-06	Fayoum
JN807813	Avian	A/chicken/Egypt/1113/2011	2011-01-11	Qalyobia
JN807808	Avian	A/chicken/Egypt/1115S/2011	2011-01-05	Qalyobia
JN807839	Avian	A/chicken/Egypt/111640V/2011	2011-02-23	Sharkia
JN807817	Avian	A/chicken/Egypt/1117/2011	2011-01-12	Qalyobia
JN807845	Avian	A/chicken/Egypt/111766V/2011	2011-03-01	Sharkia
JN807858	Avian	A/chicken/Egypt/1117AF/2011	2011-03-21	Fayoum
JN807841	Avian	A/chicken/Egypt/11184S/2011	2011-02-27	Menoufiya
JN807852	Avian	A/chicken/Egypt/111945V/2011	2011-03-13	Menoufiya
JN807821	Avian	A/chicken/Egypt/111AF/2011	2011-01-20	Fayoum
JN807865	Avian	A/chicken/Egypt/1123AL/2011	2011-04-26	Luxor
EF469650	Avian	A/chicken/Egypt/1129N3-HK9/2007	2007-01-01	Fayoum
JN807822	Avian	A/chicken/Egypt/112AF/2011	2011-01-20	Fayoum
JN807807	Avian	A/chicken/Egypt/112SG/2011	2011-01-04	Dakahlia
JN807846	Avian	A/chicken/Egypt/1134SD/2011	2011-03-03	Gharbia
JQ858472	Avian	A/chicken/Egypt/113Q/2011	2011-07-26	Qalyobia
JN807809	Avian	A/chicken/Egypt/115/2011	2011-01-05	6th of October
JQ858469	Avian	A/chicken/Egypt/11506SF/2011	2011-07-08	Menia
JN807867	Avian	A/chicken/Egypt/11529S/2011	2011-06-13	Luxor
JN807856	Avian	A/chicken/Egypt/1155/2011	2011-03-17	Helwan
JN807818	Avian	A/chicken/Egypt/1156S/2011	2011-01-12	Menoufiya
JN807830	Avian	A/chicken/Egypt/1158SF/2011	2011-01-27	Fayoum
JN807840	Avian	A/chicken/Egypt/115AD/2011	2011-02-26	Behaira
JN807825	Avian	A/chicken/Egypt/115AF/2011	2011-01-20	Fayoum
JQ858475	Avian	A/chicken/Egypt/11667s/2011	2011-07-27	Menoufiya
JQ858473	Avian	A/chicken/Egypt/11672s/2011	2011-07-26	Menoufiya
JN807843	Avian	A/chicken/Egypt/116AD/2011	2011-03-01	Behaira
JN807832	Avian	A/chicken/Egypt/116AF/2011	2011-02-07	Beni Suif
JN807819	Avian	A/chicken/Egypt/1174S/2011	2011-01-14	Suez
JQ858471	Avian	A/chicken/Egypt/1176/2011	2011-07-18	Giza
JQ858482	Avian	A/chicken/Egypt/11765s/2011	2011-12-13	Menoufiya
JN807844	Avian	A/chicken/Egypt/117AD/2011	2011-03-01	Behaira
JN807834	Avian	A/chicken/Egypt/117AF/2011	2011-02-14	Fayoum
JQ858479	Avian	A/chicken/Egypt/1188/2011	2011-10-25	Giza
JN807835	Avian	A/chicken/Egypt/118AF/2011	2011-02-16	Egypt
JN807836	Avian	A/chicken/Egypt/1197AG/2011	2011-02-19	Dakahlia
JN807806	Avian	A/chicken/Egypt/119S/2011	2011-01-04	Qalyobia
JQ858483	Avian	A/chicken/Egypt/121/2012	2012-01-06	Menia
KJ522716	Avian	A/chicken/Egypt/12107S/2012	2012-10-17	Giza
KJ522713	Avian	A/chicken/Egypt/1213CAL/2012	2012-04-24	Sohag
JQ858488	Avian	A/chicken/Egypt/12186F-12/2012	2012-02-01	Egypt
JQ858487	Avian	A/chicken/Egypt/12186F-9/2012	2012-02-01	Egypt
KJ522714	Avian	A/chicken/Egypt/12257CA/2012	2012-05-30	Qalubiya
EF469651	Avian	A/chicken/Egypt/12378N3-CLEVB/2006	2006-01-01	Gharbiya
EF469652	Avian	A/chicken/Egypt/12379N3-CLEVB/2006	2006-01-01	Sharqiya
KJ522708	Avian	A/chicken/Egypt/123AS/2012	2012-02-28	Dakahlia
KJ522712	Avian	A/chicken/Egypt/1273CA/2012	2012-04-12	Kafr Elsheikh
EF441280	Avian	A/chicken/Egypt/1300-NAMRU3/2007	2007-01-01	Gharbiya
KJ522745	Avian	A/chicken/Egypt/13153S/2013	2013-12-09	Giza
KJ522728	Avian	A/chicken/Egypt/1320S/2013	2013-02-07	Suez
KJ522734	Avian	A/chicken/Egypt/1335S/2013	2013-02-23	New valley
KJ522726	Avian	A/chicken/Egypt/134AD/2013	2013-01-30	Behaira
KJ522739	Avian	A/chicken/Egypt/13639V/2013	2013-04-16	Menoufiya
KP209296	Avian	A/chicken/Egypt/1411CAL/2014	2014-03-26	Qena
KP209299	Avian	A/chicken/Egypt/14126S/2014	2014-04-09	Assuit
KP209288	Avian	A/chicken/Egypt/1412SD/2014	2014-01-28	Behaira
KP209301	Avian	A/chicken/Egypt/141VI/2014	2014-04-14	Egypt
KP209287	Avian	A/chicken/Egypt/1422S/2014	2014-01-28	Beni Sueif
KR002633	Avian	A/chicken/Egypt/1427AF/2014	2014-09-03	Fayoum
KP209295	Avian	A/chicken/Egypt/1429AD/2014	2014-03-22	Behaira
KP209289	Avian	A/chicken/Egypt/1429S/2014	2014-02-03	Qalyobia
KP209292	Avian	A/chicken/Egypt/1460S/2014	2014-02-25	Giza
KP209293	Avian	A/chicken/Egypt/1461S/2014	2014-02-26	Assuit
KP209302	Avian	A/chicken/Egypt/147CA/2014	2014-04-17	Assuit
FJ686841	Avian	A/chicken/Egypt/14NLQP-CLEVB255/2008	2008-03-01	Dakahlya
KP035010	Avian	A/chicken/Egypt/14VIR784-10-136A/2013	2013//1/1/13	Egypt
KP035012	Avian	A/chicken/Egypt/14VIR784-11-133AL/2013	2013-01-01	Egypt
KP035022	Avian	A/chicken/Egypt/14VIR784-5-1318S/2013	2013-01-01	Egypt
FJ686843	Avian	A/chicken/Egypt/16NLQP-CLEVB242/2008	2008-02-18	Dakahlya
EU717849	Avian	A/chicken/Egypt/1709-1VIR08/2007	2007-02-25	Egypt
EU717853	Avian	A/chicken/Egypt/1709-4VIR08/2007	2007-03-04	Egypt
EU717855	Avian	A/chicken/Egypt/1709-5/2008	2008-01-08	Egypt
EU717857	Avian	A/chicken/Egypt/1709-6/2008	2008-01-03	Egypt
FJ686844	Avian	A/chicken/Egypt/17NLQP-CLEVB241/2008	2008-02-18	Sharkia
CY062601	Avian	A/chicken/Egypt/18-H/2009	2009-06-01	Egypt
EF469653	Avian	A/chicken/Egypt/1889N3-SM26/2007	2007-01-01	Giza
EF469654	Avian	A/chicken/Egypt/1890N3-HK45/2007	2007-01-01	Gharbiya
EF469659	Avian	A/chicken/Egypt/1891N3-CLEVB/2007	2007-01-01	Gharbiya
EF469660	Avian	A/chicken/Egypt/1892N3-HK49/2007	2007-01-01	Gharbiya
FJ686831	Avian	A/chicken/Egypt/1NLQP-CLEVB331/2008	2008-06-15	Giza
CY062602	Avian	A/chicken/Egypt/20-16/2009	2009-06-01	Egypt
KP869097	Avian	A/chicken/Egypt/2010	2010-12-14	Sharkia
FJ686846	Avian	A/chicken/Egypt/20NLQP-CLEVB238/2008	2008-01-26	Sharkia
DQ862001	Avian	A/chicken/Egypt/2253-1/2006	2006-06-01	Egypt
CY020645	Avian	A/chicken/Egypt/2253-1/2006	2006-01-01	Egypt
FJ686847	Avian	A/chicken/Egypt/22NLQP-CLEVB232/2008	2008-01-25	Fayoum
FJ686848	Avian	A/chicken/Egypt/23NLQP-CLEVB231/2008	2008-01-17	Cairo
FJ686849	Avian	A/chicken/Egypt/24NLQP-CLEVB227/2008	2008-01-08	Sharkia
EU373736	Avian	A/chicken/Egypt/2628-1/2007	2007-01-01	Egypt
FJ686832	Avian	A/chicken/Egypt/2NLQP-CLEVB330/2008	2008-06-15	Cairo
EU371898	Avian	A/chicken/Egypt/3044NAMRU3-CLEVB59/2007	2007-01-01	Egypt
EU371899	Avian	A/chicken/Egypt/3045NAMRU3-CLEVB60/2007	2007-01-02	Egypt
EU371900	Avian	A/chicken/Egypt/3046NAMRU3-CLEVB62/2007	2007-01-03	Egypt
EU371903	Avian	A/chicken/Egypt/3049NAMRU3-CLEVB75/2007	2007-01-04	Egypt
EU371905	Avian	A/chicken/Egypt/3051NAMRU3-CLEVB78/2007	2007-01-05	Egypt
EU371906	Avian	A/chicken/Egypt/3052NAMRU3-CLEVB104/2007	2007-01-06	Egypt
CY062603	Avian	A/chicken/Egypt/33-1/2008	2008-07-02	Egypt
CY062604	Avian	A/chicken/Egypt/34-2/2008	2008-07-02	Egypt
CY062605	Avian	A/chicken/Egypt/35-3/2008	2008-07-02	Egypt
CY062606	Avian	A/chicken/Egypt/36-4/2008	2008-07-02	Egypt
CY062607	Avian	A/chicken/Egypt/37-1/2008	2008-07-02	Egypt
CY062608	Avian	A/chicken/Egypt/38-2/2008	2008-07-02	Egypt
FJ686833	Avian	A/chicken/Egypt/3NLQP-CLEVB325/2008	2008-06-02	Sharkia
FJ686834	Avian	A/chicken/Egypt/4NLQP-CLEVB308/2008	2008-05-05	Dakahlya
FJ686835	Avian	A/chicken/Egypt/5NLQP-CLEVB307/2008	2008-05-03	Qaliobia
CY062609	Avian	A/chicken/Egypt/6-A/2010	2010-03-20	Egypt
FJ686836	Avian	A/chicken/Egypt/6NLQP-CLEVB306/2008	2008-04-29	Dakahlya
FJ686837	Avian	A/chicken/Egypt/7NLQP-CLEVB305/2008	2008-04-25	Qaliobia
CY062610	Avian	A/chicken/Egypt/8-C/2010	2010-03-20	Egypt
FJ686838	Avian	A/chicken/Egypt/8NLQP-CLEVB304/2008	2008-04-25	Qaliobia
EU371908	Avian	A/chicken/Egypt/9383NAMRU3-CLEVB112/2007	2007-01-01	Egypt
EU371910	Avian	A/chicken/Egypt/9385NAMRU3-CLEVB125/2007	2007-01-02	Egypt
EU371911	Avian	A/chicken/Egypt/9386NAMRU3-CLEVB136/2007	2007-01-03	Egypt
EU371912	Avian	A/chicken/Egypt/9387NAMRU3-CLEVB148/2007	2007-01-04	Egypt
EU371913	Avian	A/chicken/Egypt/9388NAMRU3-CLEVB149/2007	2007-01-05	Egypt
EU371914	Avian	A/chicken/Egypt/9389NAMRU3-CLEVB150/2007	2007-01-06	Egypt
EU371915	Avian	A/chicken/Egypt/9390NAMRU3-CLEVB157/2007	2007-01-07	Egypt
EU371916	Avian	A/chicken/Egypt/9391NAMRU3-CLEVB158/2007	2007-01-08	Egypt
EU371917	Avian	A/chicken/Egypt/9392NAMRU3-CLEVB167/2007	2007-01-09	Egypt
EU371918	Avian	A/chicken/Egypt/9396NAMRU3-CLEVB187/2007	2007-01-10	Egypt
EU371919	Avian	A/chicken/Egypt/9397NAMRU3-CLEVB188/2007	2007-01-11	Egypt
EU371922	Avian	A/chicken/Egypt/9400NAMRU3-CLEVB211/2007	2007-01-12	Egypt
KR063678	Avian	A/chicken/Egypt/A10351A/2014	2014-11-23	Egypt
KU715927	Avian	A/chicken/Egypt/A10537B/2015	2015-01-26	Egypt
KU715896	Avian	A/chicken/Egypt/A10540A/2015	2015-01-26	Egypt
KU715873	Avian	A/chicken/Egypt/A10540D/2015	2015-01-26	Egypt
KU715878	Avian	A/chicken/Egypt/A10540E/2015	2015-01-26	Egypt
KU715922	Avian	A/chicken/Egypt/A10542C/2015	2015-01-26	Egypt
KU715881	Avian	A/chicken/Egypt/A10543A/2015	2015-01-26	Egypt
KU715899	Avian	A/chicken/Egypt/A10543B/2015	2015-01-26	Egypt
KU715945	Avian	A/chicken/Egypt/A10544C/2015	2015-01-26	Egypt
KU715893	Avian	A/chicken/Egypt/A10544D/2015	2015-01-26	Egypt
KU715934	Avian	A/chicken/Egypt/A10758D/2015	2015-07-03	Egypt
KU715917	Avian	A/chicken/Egypt/A10759B/2015	2015-07-03	Egypt
KU715930	Avian	A/chicken/Egypt/A10759E/2015	2015-07-03	Egypt
KT220528	Avian	A/chicken/Egypt/B9039A/2013	2013-11-22	Beni-Sueif
KT220544	Avian	A/chicken/Egypt/B9040C/2013	2013-11-22	Beni Suef
KT220560	Avian	A/chicken/Egypt/B9040D/2013	2013-11-22	Beni Suef
KJ147497	Avian	A/chicken/Egypt/BSU-BS-F27/2012	2012-05-20	Beni Suef
KJ147498	Avian	A/chicken/Egypt/BSU-BS-R24/2012	2012-07-08	Beni Suef
KJ147493	Avian	A/chicken/Egypt/BSU-BS-R8/2009	2009-03-17	Beni Suef
AB497020	Avian	A/chicken/Egypt/C1Li9/2007	2007-03-01	Alexandria
AB497019	Avian	A/chicken/Egypt/C1Lu2/2007	2007-03-01	Alexandria
AB551132	Avian	A/chicken/Egypt/C3Br11/2007	2007-03-01	Alexandria
AB465592	Avian	A/chicken/Egypt/CL6/2007	2007-03-01	Alexandria
KU715895	Avian	A/chicken/Egypt/D10547C/2015	2015-01-27	Egypt
KU715969	Avian	A/chicken/Egypt/D10547E/2015	2015-01-27	Egypt
KU715954	Avian	A/chicken/Egypt/D10548B/2015	2015-01-27	Egypt
KU715939	Avian	A/chicken/Egypt/D10548D/2015	2015-01-27	Egypt
KU715921	Avian	A/chicken/Egypt/D10551C/2015	2015-01-27	Egypt
KU715926	Avian	A/chicken/Egypt/D10551D/2015	2015-01-27	Egypt
KU715965	Avian	A/chicken/Egypt/D10552B/2015	2015-01-27	Egypt
KU715968	Avian	A/chicken/Egypt/D10565A/2015	2015-01-27	Egypt
KU715910	Avian	A/chicken/Egypt/D10566A/2015	2015-01-27	Egypt
KU715937	Avian	A/chicken/Egypt/D10566C/2015	2015-01-27	Egypt
KU715924	Avian	A/chicken/Egypt/D10566D/2015	2015-01-27	Egypt
KU715918	Avian	A/chicken/Egypt/D10658E/2015	2015-02-21	Egypt
JF357723	Avian	A/chicken/Egypt/F10/2009	2009-06-10	Egypt
KY558844	Avian	A/chicken/Egypt/F12505E/2016	2016-01-23	Egypt
EU183323	Avian	A/chicken/Egypt/F3/2006	2006-06-01	Fayoum
EU183324	Avian	A/chicken/Egypt/F4/2006	2006-12-05	Beni Suef
EU183326	Avian	A/chicken/Egypt/F6/2007	2007-03-06	Beni Suef
JF357720	Avian	A/chicken/Egypt/F7/2009	2009-03-17	Fayoum
JF357721	Avian	A/chicken/Egypt/F8/2009	2009-03-24	Fayoum
JF357722	Avian	A/chicken/Egypt/F9/2009	2009-04-01	Ismailia
KT220539	Avian	A/chicken/Egypt/F9514A/2014	2014-01-27	Dakahliya
KT220549	Avian	A/chicken/Egypt/F9514B/2014	2014-01-27	Dakahliya
KT220555	Avian	A/chicken/Egypt/F9514E/2014	2014-01-27	Dakahliya
KT220534	Avian	A/chicken/Egypt/F9519D/2014	2014-01-27	Dakahliya
KP326324	Avian	A/chicken/Egypt/Fadllah-7/2014	2014-11-01	Menoufiya
JF746740	Avian	A/chicken/Egypt/G3H4-NLQP/2008	2008-03-01	Egypt
CY099582	Avian	A/chicken/Egypt/M2773A/2011	2011-01-19	Egypt
KF258179	Avian	A/chicken/Egypt/M7217A/2013	2013-01-31	Egypt
KF732012	Avian	A/chicken/Egypt/M7217B/2013	2013-01-31	Egypt
KP322737	Avian	A/chicken/Egypt/N05807-CLEVB459/2009	2009-03-01	Qalyubia
KP322738	Avian	A/chicken/Egypt/N05811-CLEVB521/2009	2009-04-18	Qalyubia
KP322739	Avian	A/chicken/Egypt/N05832-CLEVB754/2011	2011-03-06	Fayoum
KY558870	Avian	A/chicken/Egypt/N12638D/2016	2016-05-08	Egypt
KY558852	Avian	A/chicken/Egypt/N12642E/2016	2016-05-08	Egypt
KY558850	Avian	A/chicken/Egypt/N12643B/2016	2016-05-08	Egypt
FR687256	Avian	A/chicken/Egypt/Q1011/2010	2010-01-01	Qalubiya
KU715900	Avian	A/chicken/Egypt/Q10574B/2015	2015-01-31	Egypt
KU715915	Avian	A/chicken/Egypt/Q10646A/2015	2015-02-16	Egypt
KU715864	Avian	A/chicken/Egypt/Q10777B/2015	2015-11-03	Egypt
KU715888	Avian	A/chicken/Egypt/Q10781B/2015	2015-11-03	Egypt
KF881632	Avian	A/chicken/Egypt/Q1089E/2010	2010-01-13	Egypt
KF881531	Avian	A/chicken/Egypt/Q1090E/2010	2010-01-13	Egypt
KU715944	Avian	A/chicken/Egypt/Q10920C/2015	2015-04-15	Egypt
KF881582	Avian	A/chicken/Egypt/Q1112E/2010	2010-01-27	Egypt
KF881362	Avian	A/chicken/Egypt/Q1118D/2010	2010-01-27	Egypt
FR687258	Avian	A/chicken/Egypt/Q1182/2010	2010-01-01	Qalubiya
KF881467	Avian	A/chicken/Egypt/Q1182E/2010	2010-02-03	Egypt
KF881438	Avian	A/chicken/Egypt/Q1184B/2010	2010-02-15	Egypt
KF881690	Avian	A/chicken/Egypt/Q1397D/2010	2010-03-20	Egypt
KF881416	Avian	A/chicken/Egypt/Q1769B/2010	2010-05-30	Egypt
KF881711	Avian	A/chicken/Egypt/Q1995A/2010	2010-07-23	Egypt
CY099579	Avian	A/chicken/Egypt/Q1995D/2010	2010-08-23	Egypt
KF881491	Avian	A/chicken/Egypt/Q2247A/2010	2010-09-29	Egypt
KF881719	Avian	A/chicken/Egypt/Q2247B/2010	2010-09-29	Egypt
KF258176	Avian	A/chicken/Egypt/Q5283C/2012	2012-05-06	Egypt
KT220551	Avian	A/chicken/Egypt/Q7630D/2013	2013-04-08	Qalubiya
EU183327	Avian	A/chicken/Egypt/R1/2006	2006-12-25	Beni Suef
EU183328	Avian	A/chicken/Egypt/R2/2007	2007-01-01	Beni Suef
EU183329	Avian	A/chicken/Egypt/R3/2007	2007-02-01	Beni Suef
EU183332	Avian	A/chicken/Egypt/R6/2007	2007-02-26	Beni Suef
AB601121	Avian	A/chicken/Egypt/RIMD1-5/2008	2008-08-01	Behaira
AB601129	Avian	A/chicken/Egypt/RIMD10-6/2008	2008-08-01	Behaira
AB601130	Avian	A/chicken/Egypt/RIMD11-1/2008	2008-06-01	Gharbia
AB601123	Avian	A/chicken/Egypt/RIMD12-3/2008	2008-01-01	Behaira
AB601131	Avian	A/chicken/Egypt/RIMD13-1/2008	2008-01-01	Behaira
AB601122	Avian	A/chicken/Egypt/RIMD2-6/2008	2008-01-01	Alexandria
AB601132	Avian	A/chicken/Egypt/RIMD21-2/2009	2009-01-01	Behaira
AB601133	Avian	A/chicken/Egypt/RIMD25-1/2009	2009-01-01	Behaira
AB601134	Avian	A/chicken/Egypt/RIMD26-3/2009	2009-01-01	Behaira
AB601135	Avian	A/chicken/Egypt/RIMD27-2/2009	2009-01-02	Alexandria
AB601124	Avian	A/chicken/Egypt/RIMD4-3/2008	2008-01-02	Behaira
AB601125	Avian	A/chicken/Egypt/RIMD5-3/2008	2008-01-06	Alexandria
AB601126	Avian	A/chicken/Egypt/RIMD7-1/2008	2008-01-03	Behaira
AB601127	Avian	A/chicken/Egypt/RIMD8-14/2008	2008-01-09	Behaira
KU715919	Avian	A/chicken/Egypt/S10738B/2015	2015-04-03	Egypt
KU715884	Avian	A/chicken/Egypt/S10739C/2015	2015-04-03	Egypt
KU715871	Avian	A/chicken/Egypt/S10937B/2015	2015-02-20	Egypt
CY099592	Avian	A/chicken/Egypt/S2938A/2011	2011-02-28	Egypt
KF881655	Avian	A/chicken/Egypt/S2938D/2011	2011-02-28	Egypt
CY099593	Avian	A/chicken/Egypt/S3093A/2011	2011-03-30	Egypt
CY099587	Avian	A/chicken/Egypt/S3280B/2011	2011-05-12	Egypt
CY099588	Avian	A/chicken/Egypt/S3280D/2011	2011-05-12	Egypt
KF881603	Avian	A/chicken/Egypt/S3280E/2011	2011-05-12	Egypt
JX912986	Avian	A/chicken/Egypt/S3806A/2011	2011-09-04	Egypt
JN714467	Avian	A/chicken/Egypt/VSVRI/2009	2009-01-09	Egypt
KY029063	Avian	A/chicken/Egypt/ZU103/2016	2016-02-20	Egypt
KY029064	Avian	A/chicken/Egypt/ZU105/2016	2016-02-20	Egypt
KY029066	Avian	A/chicken/Egypt/ZU116/2016	2016-02-20	Egypt
KY029069	Avian	A/chicken/Egypt/ZU120/2016	2016-02-26	Egypt
KY029054	Avian	A/chicken/Egypt/ZU2/2016	2016-02-15	Egypt
KY029056	Avian	A/chicken/Egypt/ZU28/2016	2016-02-15	Egypt
KY029057	Avian	A/chicken/Egypt/ZU29/2016	2016-02-15	Egypt
KY029059	Avian	A/chicken/Egypt/ZU34/2016	2016-02-15	Egypt
KY029060	Avian	A/chicken/Egypt/ZU46/2016	2016-02-15	Egypt
KY029061	Avian	A/chicken/Egypt/ZU47/2016	2016-02-15	Egypt
KY029062	Avian	A/chicken/Egypt/ZU53/2016	2016-02-15	Egypt
KY951988	Avian	A/chicken/Giza/3/2015	2015-07-01	Giza
CY126168	Avian	A/chicken/Giza/CAI15/2008	2008-06-01	Giza
CY126176	Avian	A/chicken/Giza/CAI17/2009	2009-07-01	Giza
CY126208	Avian	A/chicken/Giza/CAI22/2008	2008-06-30	Giza
CY126216	Avian	A/chicken/Giza/CAI23/2008	2008-06-30	Giza
CY126058	Avian	A/chicken/Giza/CAI37/2009	2009-05-20	Giza
CY126128	Avian	A/chicken/Giza/CAI7/2008	2008-03-01	Giza
CY126136	Avian	A/chicken/Giza/CAI8/2008	2008-04-01	Giza
CY126026	Avian	A/chicken/Menofia/CAI29/2009	2009-10-01	Menoufiya
CY126034	Avian	A/chicken/Menofia/CAI30/2010	2010-03-01	Menoufiya
CY126240	Avian	A/chicken/Menofia/CAI35/2010	2010-04-21	Menoufiya
CY126248	Avian	A/chicken/Menofia/CAI36/2010	2010-04-21	Menoufiya
CY126264	Avian	A/chicken/Menofia/CAI39/2010	2010-03-03	Menoufiya
CY126152	Avian	A/chicken/Qalubia/CAI12/2008	2008-06-30	Qalubiya
CY126160	Avian	A/chicken/Qalubia/CAI14/2008	2008-03-01	Qalubiya
CY126192	Avian	A/chicken/Qalubia/CAI20/2008	2008-06-30	Qalubiya
CY126200	Avian	A/chicken/Qalubia/CAI21/2008	2008-06-30	Qalubiya
CY126112	Avian	A/chicken/Qalubia/CAI5/2008	2008-06-30	Qalubiya
KY951989	Avian	A/chicken/Sharkia/4/2015	2015-02-15	Sharkia
CY126104	Avian	A/chicken/Sharkia/CAI3/2009	2009-09-01	Sharkia
CY126256	Avian	A/chicken/Sharkia/CAI38/2009	2009-05-20	Sharkia
EU371907	Avian	A/crow/Egypt/9382NAMRU3-CLEVB111/2007	2007-01-01	Egypt
EU496392	Avian	A/duck/Egypt/07322S-NLQP/2007	2007-03-20	Menia
GQ184250	Avian	A/duck/Egypt/08425S-NLQP/2008	2008-02-27	Menia
GQ184244	Avian	A/duck/Egypt/0845S-NLQP/2008	2008-01-03	Menoufiya
CY044040	Avian	A/duck/Egypt/0871/2008	2008-02-20	Gharbia
GQ184235	Avian	A/duck/Egypt/0875-NLQP/2008	2008-04-06	Matrouh
GQ184237	Avian	A/duck/Egypt/0877-NLQP/2008	2008-04-15	Luxor
GQ184240	Avian	A/duck/Egypt/0891-NLQP/2008	2008-09-26	Fayoum
JF746738	Avian	A/duck/Egypt/0897-NLQP/2008	2008-12-01	Egypt
GU002674	Avian	A/duck/Egypt/0918-NLQP/2009	2009-02-01	Egypt
GU002686	Avian	A/duck/Egypt/09224F-NLQP/2009	2009-05-01	Qalyobia
GU002675	Avian	A/duck/Egypt/0923-NLQP/2009	2009-02-01	Gharbia
GU002676	Avian	A/duck/Egypt/0926-NLQP/2009	2009-02-01	Egypt
GU002685	Avian	A/duck/Egypt/093L-NLQP/2009	2009-02-01	Aswan
GU002678	Avian	A/duck/Egypt/0955-NLQP/2009	2009-03-01	Sharkia
GU002681	Avian	A/duck/Egypt/0964-NLQP/2009	2009-03-01	Gharbia
GU002697	Avian	A/duck/Egypt/0971SM-NLQP/2009	2009-02-01	Menoufiya
GU002682	Avian	A/duck/Egypt/0972-NLQP/2009	2009-04-01	Menia
GU002673	Avian	A/duck/Egypt/099-NLQP/2009	2009-01-01	Alexandria
GU002696	Avian	A/duck/Egypt/0990SM-NLQP/2009	2009-02-01	Sharkia
JN807794	Avian	A/duck/Egypt/10118/2010	2010-09-14	Menoufiya
HQ198271	Avian	A/duck/Egypt/1011d/2010	2010-02-01	Alexandria
JN807800	Avian	A/duck/Egypt/10131/2010	2010-10-20	Menoufiya
HQ198272	Avian	A/duck/Egypt/101565v/2010	2010-02-01	Qalyobia
HQ198259	Avian	A/duck/Egypt/1017/2010	2010-01-01	Egypt
JN807780	Avian	A/duck/Egypt/10185SS/2010	2010-06-10	Sharkia
HQ198279	Avian	A/duck/Egypt/1020sd/2010	2010-02-01	Kafr-Elshekh
JN807783	Avian	A/duck/Egypt/10228SF/2010	2010-06-28	Beni Suif
JN807786	Avian	A/duck/Egypt/10255AG/2010	2010-07-20	Dakahlia
JN807795	Avian	A/duck/Egypt/10283SF/2010	2010-09-16	Fayoum
JN807796	Avian	A/duck/Egypt/10290SF/2010	2010-09-22	Fayoum
JN807798	Avian	A/duck/Egypt/10331SF/2010	2010-10-12	Beni-suif
JN807799	Avian	A/duck/Egypt/10336SF/2010	2010-10-14	Beni-suif
HQ198256	Avian	A/duck/Egypt/103swf/2010	2010-01-01	Fayoum
JN807774	Avian	A/duck/Egypt/1046SF/2010	2010-02-24	Menia
HQ198293	Avian	A/duck/Egypt/1063s/2010	2010-02-01	Gharbia
HQ198285	Avian	A/duck/Egypt/1068s/2010	2010-02-01	Gharbia
HQ198287	Avian	A/duck/Egypt/106d/2010	2010-02-01	Gharbia
JN807850	Avian	A/duck/Egypt/11106SF/2011	2011-03-08	Behaira
JN807842	Avian	A/duck/Egypt/1110AF/2011	2011-02-28	Behaira
JN807857	Avian	A/duck/Egypt/11117SS/2011	2011-03-18	Sharkia
JX576786	Avian	A/duck/Egypt/1111sg-NLQP/2011	2011-08-26	Behaira
JN807814	Avian	A/duck/Egypt/1113SD/2011	2011-01-11	Gharbia
JN807854	Avian	A/duck/Egypt/1116AF/2011	2011-03-15	Fayoum
JN807860	Avian	A/duck/Egypt/11175SF/2011	2011-04-04	Fayoum
JN807861	Avian	A/duck/Egypt/11193SF/2011	2011-04-11	Fayoum
JQ858470	Avian	A/duck/Egypt/1120SMF/2011	2011-07-14	Fayoum
JN807848	Avian	A/duck/Egypt/11211S/2011	2011-03-06	Fayoum
JN807851	Avian	A/duck/Egypt/11221S/2011	2011-03-09	Sharkia
JN807816	Avian	A/duck/Egypt/1123SF/2011	2011-01-11	Menia
JN807810	Avian	A/duck/Egypt/1125S/2011	2011-01-06	Menoufiya
JN807811	Avian	A/duck/Egypt/1130AG/2011	2011-01-09	Dakahlia
JN807849	Avian	A/duck/Egypt/1153/2011	2011-03-06	Qalyobia
JQ858476	Avian	A/duck/Egypt/11685s/2011	2011-08-22	Qalyobia
JN807833	Avian	A/duck/Egypt/1174SF/2011	2011-02-13	Fayoum
JQ858480	Avian	A/duck/Egypt/11762s/2011	2011-11-29	Menia
KJ522715	Avian	A/duck/Egypt/12106S/2012	2012-10-16	Menoufiya
KJ522717	Avian	A/duck/Egypt/12133S/2012	2012-11-08	Menoufiya
KJ522718	Avian	A/duck/Egypt/12143S/2012	2012-11-20	Giza
EF469655	Avian	A/duck/Egypt/12380N3-CLEVB/2006	2006-01-01	Gharbiya
EF441281	Avian	A/duck/Egypt/1301-NAMRU3/2007	2007-01-01	Gharbiya
EF469656	Avian	A/duck/Egypt/13010N3-CLEVB/2006	2006-01-01	Menoufiya
KJ522721	Avian	A/duck/Egypt/1310SD/2013	2013-01-16	Behaira
KJ522725	Avian	A/duck/Egypt/1313S/2013	2013-01-29	Giza
KJ522727	Avian	A/duck/Egypt/131AL/2013	2013-01-31	Luxor
KJ522731	Avian	A/duck/Egypt/132AL/2013	2013-02-20	Luxor
KJ522735	Avian	A/duck/Egypt/1338S/2013	2013-02-27	New valley
KP209286	Avian	A/duck/Egypt/141AI/2014	2014-01-20	Ismailia
KP209291	Avian	A/duck/Egypt/1435CAS/2014	2014-02-17	Sharkia
KP209294	Avian	A/duck/Egypt/1468S/2014	2014-02-28	Giza
KP209297	Avian	A/duck/Egypt/1471SG/2014	2014-03-27	Damiatt
KP035030	Avian	A/duck/Egypt/14VIR784-4-133AD/2013	2014-11-22	Behaira
KP035038	Avian	A/duck/Egypt/14VIR784-6-1328S/2013	2014-11-23	Egypt
KP035046	Avian	A/duck/Egypt/14VIR784-8-1339S/2013	2013-01-03	Egypt
EU717851	Avian	A/duck/Egypt/1709-3VIR08/2007	2008-05-25	Egypt
KU357036	Avian	A/duck/Egypt/2/2015	2015-04-06	Egypt
DQ862002	Avian	A/duck/Egypt/2253-3/2006	2006-06-01	Egypt
CY016899	Avian	A/duck/Egypt/2253-3/2006	2006-01-01	Egypt
KU357037	Avian	A/duck/Egypt/3/2015	2015-04-06	Egypt
EU371897	Avian	A/duck/Egypt/3043NAMRU3-CLEVB56/2007	2007-01-01	Egypt
EU371901	Avian	A/duck/Egypt/3047NAMRU3-CLEVB63/2007	2007-01-01	Egypt
KU357038	Avian	A/duck/Egypt/4/2015	2015-04-06	Egypt
KU357039	Avian	A/duck/Egypt/5/2015	2015-04-06	Egypt
EU373737	Avian	A/duck/Egypt/5169-1/2007	2007-01-01	Egypt
EU371921	Avian	A/duck/Egypt/9399NAMRU3-CLEVB202/2007	2007-01-01	Egypt
KJ147492	Avian	A/duck/Egypt/BSU-BS-R7/2008	2008-11-15	Beni Suef
KJ147494	Avian	A/duck/Egypt/BSU-BS-R9/2009	2009-03-17	Beni Suef
KJ147496	Avian	A/duck/Egypt/BSU-FA-1D/2012	2012-02-15	Beni Suef
AB497012	Avian	A/duck/Egypt/D1Br12/2007	2007-01-01	Damanhur
AB497013	Avian	A/duck/Egypt/D1Li4/2007	2007-01-01	Damanhur
AB497011	Avian	A/duck/Egypt/D1Tr335/2007	2007-01-01	Damanhur
AB497014	Avian	A/duck/Egypt/D2Br210/2007	2007-01-01	Damanhur
AB497015	Avian	A/duck/Egypt/D2Li234/2007	2007-01-01	Damanhur
AB497017	Avian	A/duck/Egypt/D3Li12/2007	2007-01-01	Damanhur
AB497016	Avian	A/duck/Egypt/D3Lu6/2007	2007-01-01	Damanhur
EU183325	Avian	A/duck/Egypt/F5/2006	2006-12-25	Minia
KT220533	Avian	A/duck/Egypt/F7289E/2013	2013-02-05	Fayoum
CY099578	Avian	A/duck/Egypt/M2583A/2010	2010-12-22	Egypt
CY099589	Avian	A/duck/Egypt/M2583B/2010	2010-12-22	Egypt
CY099580	Avian	A/duck/Egypt/M2583D/2010	2010-12-22	Egypt
CY099586	Avian	A/duck/Egypt/M3075B/2011	2011-02-20	Egypt
KF258185	Avian	A/duck/Egypt/M7218B/2013	2013-01-31	Egypt
CY099581	Avian	A/duck/Egypt/Q2645C/2010	2010-12-26	Egypt
KF258175	Avian	A/duck/Egypt/Q4596A/2012	2012-01-19	Egypt
KF881408	Avian	A/duck/Egypt/Q4596B/2012	2012-01-19	Egypt
JX912988	Avian	A/duck/Egypt/Q4596C/2012	2012-01-19	Egypt
JX912994	Avian	A/duck/Egypt/Q4596D/2012	2012-01-19	Egypt
EU183331	Avian	A/duck/Egypt/R5/2007	2007-02-20	Beni Suef
KF258189	Avian	A/duck/Egypt/S6419C/2012	2012-10-07	Egypt
KF258188	Avian	A/duck/Egypt/S6419E/2012	2012-10-07	Egypt
CY126096	Avian	A/duck/El Fayoum/CAI1/2010	2013-02-04	Fayoum
CY125961	Avian	A/duck/El Fayoum/CAI9/2010	2013-02-04	Fayoum
CY125969	Avian	A/duck/Qalubia/CAI11/2010	2010-03-01	Qalubiya
HQ198253	Avian	A/goose/Egypt/09134sml/2009	/09/2009	Sohag
GU002677	Avian	A/goose/Egypt/0929-NLQP/2009	/02/2009	Fayoum
JN807779	Avian	A/goose/Egypt/10209SF/2010	2010-06-09	Fayoum
HQ198283	Avian	A/goose/Egypt/1057/2010	2010/02/	Menoufiya
JN807838	Avian	A/goose/Egypt/11162S/2011	2011-02-22	Menoufiya
JN807815	Avian	A/goose/Egypt/1117SF/2011	2011-10-24	Fayoum
JN807862	Avian	A/goose/Egypt/11350S/2011	2011-04-12	Giza
EF469658	Avian	A/goose/Egypt/13009N3-SM2/2006	2006-01-01	Menoufiya
KJ522723	Avian	A/goose/Egypt/135S/2013	2013-01-17	Menoufiya
KP209303	Avian	A/goose/Egypt/1439FAOS/2014	2014-04-29	Assuit
CY099583	Avian	A/goose/Egypt/M2788A/2011	2011-01-20	Egypt
KF258180	Avian	A/goose/Egypt/M7221D/2013	2013-01-31	Egypt
EU183330	Avian	A/goose/Egypt/R4/2007	2007-02-01	Beni Suef
GQ184217	Avian	A/peacock/Egypt/07667S-NLQP/2007	2007-12-25	Giza
EU496385	Avian	A/quail/Egypt/07120-NLQP/2007	2007-02-03	Alexandria
JN807866	Avian	A/quail/Egypt/1171SG/2011	2011-05-08	Egypt
EU371904	Avian	A/quail/Egypt/3050NAMRU3-CLEVB77/2007	2007-01-01	Egypt
EU496394	Avian	A/turkey/Egypt/07444S-NLQP/2007	2007-05-24	Damitta
GU002701	Avian	A/turkey/Egypt/0935-NLQP/2009	2009/02/	Egypt
GU002679	Avian	A/turkey/Egypt/0959-NLQP/2009	2009/02/	Behaira
HQ198276	Avian	A/turkey/Egypt/101474v/2010	2010/02/	Giza
JN807791	Avian	A/turkey/Egypt/10453F/2010	2010-08-08	Kafr-ElShikh
KJ522709	Avian	A/turkey/Egypt/1248CA/2012	2012-04-04	Assiut
KJ522720	Avian	A/turkey/Egypt/134S/2013	2013-01-15	Giza
KJ522737	Avian	A/turkey/Egypt/137/2013	2013-03-03	New valley
KP209298	Avian	A/turkey/Egypt/14125S/2014	2014-04-09	Assuit
KP209300	Avian	A/turkey/Egypt/1414CAL/2014	2014-04-10	Qena
KP209290	Avian	A/turkey/Egypt/1438S/2014	2014-02-09	Giza
CY020653	Avian	A/turkey/Egypt/2253-2/2006	2006-01-01	Egypt
CY055191	Avian	A/turkey/Egypt/7/2007	2007-01-01	Egypt
EU371920	Avian	A/turkey/Egypt/9398NAMRU3-CLEVB195/2007	2007-01-01	Egypt
EU183321	Avian	A/turkey/Egypt/F1/2006	2006-02-25	Minia
EU183322	Avian	A/turkey/Egypt/F2/2006	2006-03-01	Qalubiya
KF258178	Avian	A/turkey/Egypt/S6405A/2012	2012-10-07	Egypt
KF258182	Avian	A/turkey/Egypt/S6405D/2012	2012-10-07	Egypt
KF258181	Avian	A/turkey/Egypt/S6405E/2012	2012-10-07	Egypt
EF535822	Human	A/Egypt/2321-NAMRU3/2007(H5N1)	2007-03-13	Aswan
CY062439	Human	A/Egypt/7021-NAMRU3/2006(H5N1)	2006-05-16	Menia
KP702165	Human	A/Egypt/MOH-NRC-7271/2014(H5N1)	2014-11-26	Menia
KP702173	Human	A/Egypt/MOH-NRC-7305/2014(H5N1)	2014-11-28	Menia
KR063683	Human	A/Egypt/MOH-NRC-8434/2014(H5N1)	2014-12-27	Menoufiya
CY041908	Human	A/Egypt/N00001/2009(H5N1)	2009-01-11	Giza
KP864432	Human	A/Egypt/N0001/2015(H5N1)	2015-01-01	Menoufiya
KP864433	Human	A/Egypt/N0002/2015(H5N1)	2015-01-01	Menia
KP864434	Human	A/Egypt/N0004/2015(H5N1)	2015-01-05	Aswan
KP864435	Human	A/Egypt/N0005/2015(H5N1)	2015-01-07	Cairo
CY062464	Human	A/Egypt/N00269/2010(H5N1)	2010-01-11	Beni Suef
CY062466	Human	A/Egypt/N00270/2010(H5N1)	2010-01-12	Daqahlia
CY041910	Human	A/Egypt/N00585/2009(H5N1)	2009-01-23	Menoufiya
CY041912	Human	A/Egypt/N00605/2009(H5N1)	2009-02-03	Suez
CY041914	Human	A/Egypt/N00606/2009(H5N1)	2009-02-07	Menia
JX456101	Human	A/Egypt/N00951/2012(H5N1)	2012-02-21	Behaira
CY041916	Human	A/Egypt/N01310/2009(H5N1)	2009-02-28	Fayoum
CY062468	Human	A/Egypt/N01360/2010(H5N1)	2010-02-02	Qalubiya
CY062470	Human	A/Egypt/N01644/2010(H5N1)	2010-02-07	Helwan
KM392416	Human	A/Egypt/N01753/2014(H5N1)	2014-03-06	Behaira
KM392417	Human	A/Egypt/N01754/2014(H5N1)	2014-03-07	Demiatta
CY062474	Human	A/Egypt/N02038/2010(H5N1)	2010-02-15	Daqahlia
CY041918	Human	A/Egypt/N02039/2009(H5N1)	2009-03-03	Alexandria
CY062476	Human	A/Egypt/N02127/2010(H5N1)	2010-02-13	Kafr el sheikh
JX456104	Human	A/Egypt/N02137/2012(H5N1)	2012-03-29	Giza
CY041920	Human	A/Egypt/N02407/2009(H5N1)	2009-03-09	Menoufiya
CY062478	Human	A/Egypt/N02554/2010(H5N1)	2010-02-23	Qalubiya
CY041922	Human	A/Egypt/N02563/2009(H5N1)	2009-03-14	Assuit
CY041924	Human	A/Egypt/N02752/2009(H5N1)	2009-03-24	Qena
CY062480	Human	A/Egypt/N02770/2010(H5N1)	2010-02-27	Qalubiya
CY062482	Human	A/Egypt/N03071/2010(H5N1)	2010-03-03	Kafr el sheikh
CY062484	Human	A/Egypt/N03072/2010(H5N1)	2010-03-07	Cairo
CY041926	Human	A/Egypt/N03228/2009(H5N1)	2009-03-30	Menoufiya
CY041928	Human	A/Egypt/N03272/2009(H5N1)	2009-04-01	Behaira
CY041930	Human	A/Egypt/N03434/2009(H5N1)	2009-04-15	Kafr el sheikh
CY041932	Human	A/Egypt/N03438/2009(H5N1)	2009-04-16	Cairo
CY041934	Human	A/Egypt/N03439/2009(H5N1)	2009-04-18	Kafr el sheikh
CY041936	Human	A/Egypt/N03450/2009(H5N1)	2009-04-19	Sohag
CY041938	Human	A/Egypt/N04316/2009(H5N1)	2009-05-09	Sohag
CY041940	Human	A/Egypt/N04394/2009(H5N1)	2009-05-11	Sharqiya
CY041943	Human	A/Egypt/N04396/2009(H5N1)	2009-05-17	Daqahlia
CY062486	Human	A/Egypt/N04434/2010(H5N1)	2010-03-31	Fayoum
CY041945	Human	A/Egypt/N04526/2009(H5N1)	2009-05-18	Daqahlia
CY041947	Human	A/Egypt/N04527/2009(H5N1)	2009-05-18	Sohag
CY041949	Human	A/Egypt/N04822/2009(H5N1)	2009-05-25	Sharqiya
CY041951	Human	A/Egypt/N04823/2009(H5N1)	2009-05-25	Sharqiya
CY041953	Human	A/Egypt/N04979/2009(H5N1)	2009-05-31	Kafr el sheikh
CY041955	Human	A/Egypt/N05056/2009(H5N1)	2009-06-06	Daqahlia
CY062447	Human	A/Egypt/N05912/2009(H5N1)	2009-06-16	Kafr el sheikh
CY062453	Human	A/Egypt/N08835/2009(H5N1)	2009-08-01	Menoufiya
CY062455	Human	A/Egypt/N09174/2009(H5N1)	2009-08-26	Menoufiya
CY062457	Human	A/Egypt/N09539/2009(H5N1)	2009-09-16	Alexandria
CY062459	Human	A/Egypt/N11981/2009(H5N1)	2009-11-22	Menia
KP864426	Human	A/Egypt/N5560/2014(H5N1)	2014-12-15	Assuit
KP864427	Human	A/Egypt/N5561/2014(H5N1)	2014-12-14	Menia
KP864428	Human	A/Egypt/N5563/2014(H5N1)	2014-12-23	Menia
KP864429	Human	A/Egypt/N5564/2014(H5N1)	2014-12-26	Helwan
KP864430	Human	A/Egypt/N5565/2014(H5N1)	2014-12-24	Assuit
KP864431	Human	A/Egypt/N5566/2014(H5N1)	2014-12-26	Giza
CY062472	Human	A/Egypt/N01982/2010(H5N1)	2010-02-12	Menoufiya
